P4619

### Comparison of the CRUSADE, ACUITY-HORIZONS, and ACTION bleeding risk scores for predicting in-hospital bleeding in acute myocardial infarction patients undergoing primary PCI

Z. Mehmedbegovic<sup>1</sup>, D. Milasinovic<sup>1</sup>, D. Jelic<sup>1</sup>, V. Zobenica<sup>1</sup>, D. Matic<sup>1</sup>, V. Dedovic<sup>1</sup>, M. Radomirovic<sup>2</sup>, A. Pavlovic<sup>3</sup>, I. Veljic<sup>1</sup>, S. Zaharijev<sup>1</sup>, M. Asanin<sup>1</sup>, V. Vukcevic<sup>1</sup>, G. Stankovic<sup>1</sup>

<sup>1</sup>Clinical center of Serbia, Department of cardiology, Belgrade, Serbia; <sup>2</sup>University of Belgrade, School of Medicine, Belgrade, Serbia; <sup>3</sup>University Children's Hospital of Belgrade, Belgrade, Serbia

**Background:** Considering clinical importance of bleeding complications in patients with acute myocardial infarction (AMI), bleeding risk stratification is a key part of the management of these patients. CRUSADE, ACTION and ACUITY-HORIZONS bleeding risk scores are available for predicting in-hospital major bleeding events in patients with acute myocardial infarction.

**Purpose:** We aimed to evaluate performance of the three above mentioned risk scores for predicting in-hospital bleeding events defined according to The Bleeding Academic Research Consortium (BARC) criteria.

**Methods:** From a prospective electronic registry of a high-volume catheterization laboratory in a period from January 2009 to December 2017, a total of 6505 consecutive patients with acute myocardial infarction who underwent pPCI were included in analysis. Calibration and discrimination

of the three risk models were evaluated by the Hosmer-Lemeshow (H-L) goodness-of-fit test and C-statistic, respectively.

**Results:** Overall there were 372 (5.7%) bleeding events out of which 117 (1.8%) fulfilled stage BARC 3 or higher bleeding criteria. All three scores showed good model calibration as assessed by the H-Ls test and very good discriminative power for BARC 3 of higher bleeding events detection as assessed by C-statistics (Table 1 & Figure 1):

Bleeding events stage BARC 3 or higher were statistically highly related with higher in-hospital mortality (13.7% vs. 3.5%; p<0.000).

**Conclusions:** All three evaluated scores showed very good discriminative capacity for predicting BARC 3 or higher bleeding events in patients undergoing pPCI for AMI.

Table 1

| Risk score      | H-L   | H-L p | AUC   | 95% CI      | p                                    |
|-----------------|-------|-------|-------|-------------|--------------------------------------|
| CRUSADE         | 11.46 | 0.177 | 0.761 | 0.750–0.771 | vs. ACUITY = ns<br>vs. ACTION <0.000 |
| ACUITY-HORIZONS | 10.47 | 0.236 | 0.735 | 0.724–0.745 | vs. ACTION = ns                      |
| ACTION          | 5.74  | 0.677 | 0.701 | 0.698–0.712 |                                      |

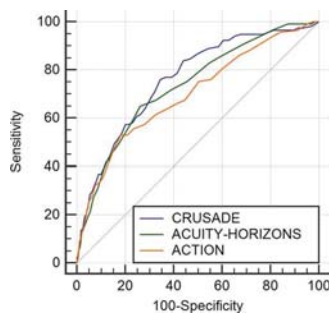

Figure 1
